# Supplementary material
Source: PubMed Central journal article supplement (PMC8996310)

**A**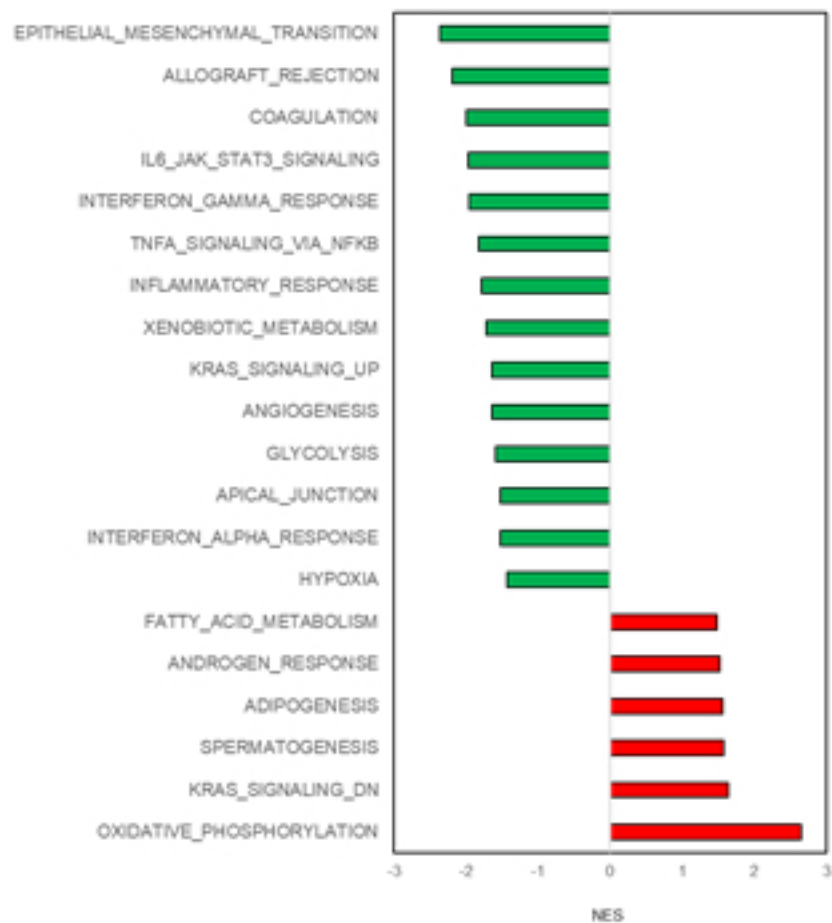**B**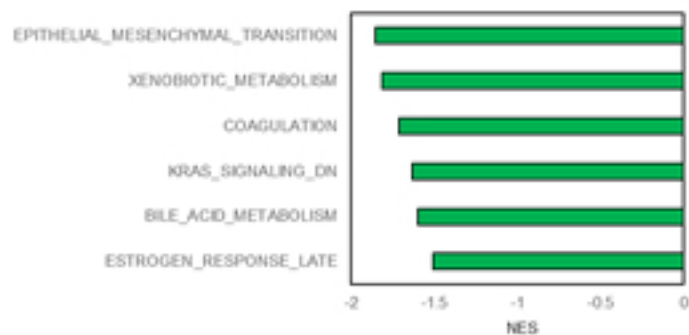

Supplement: NIHMS1789793-supplement-SUPPL_FIGURE_1.pdf [file NIHMS1789793-supplement-SUPPL_FIGURE_1.pdf]

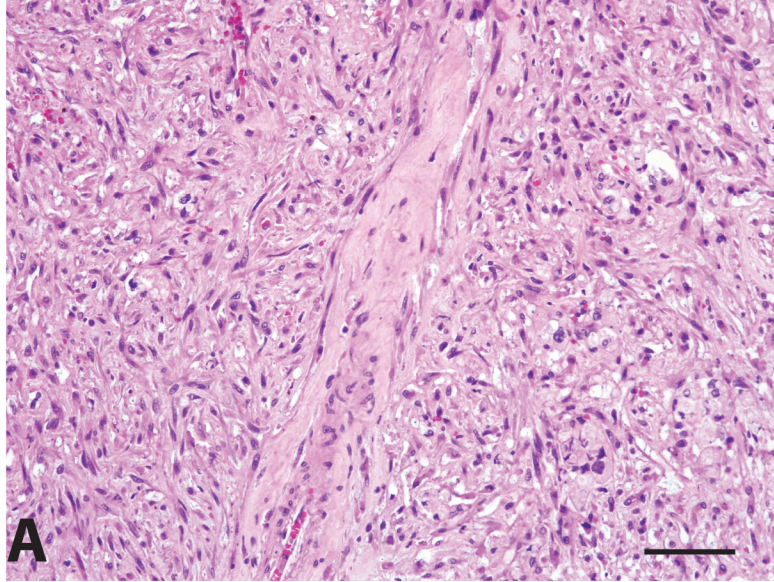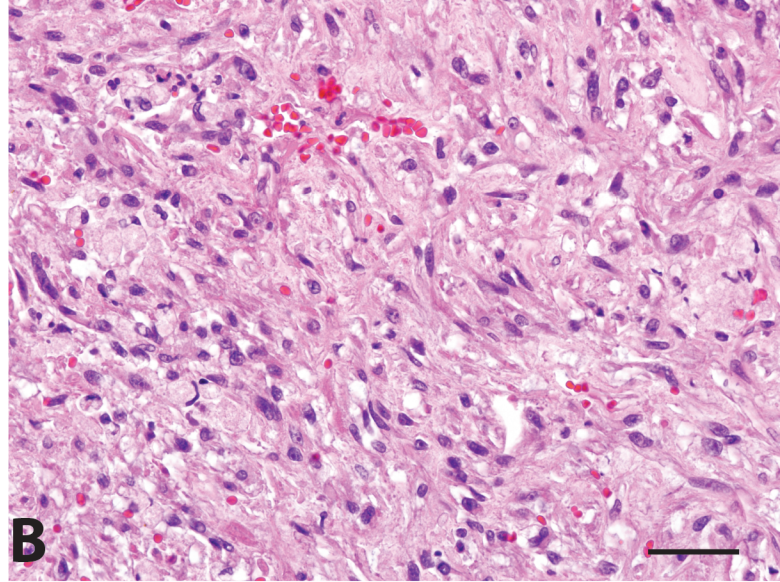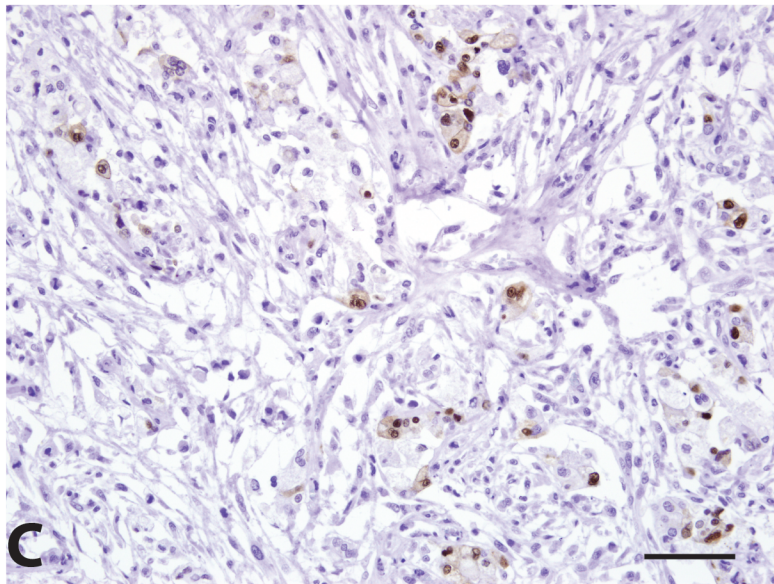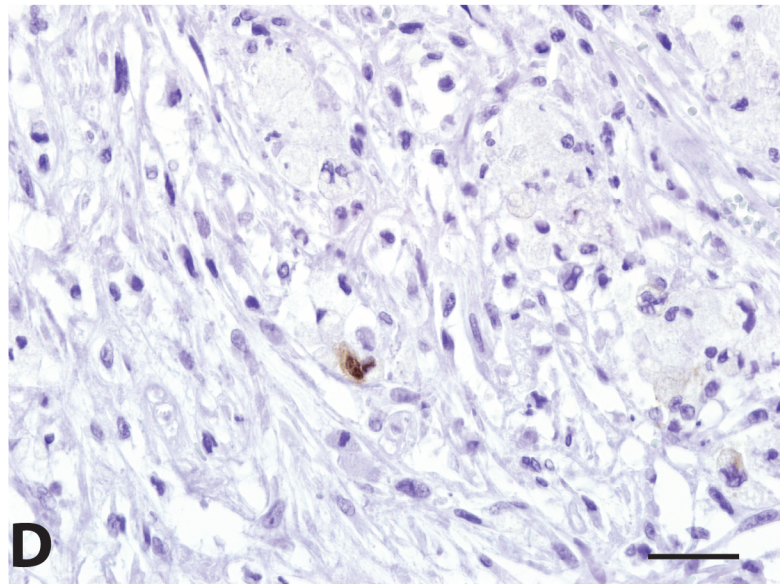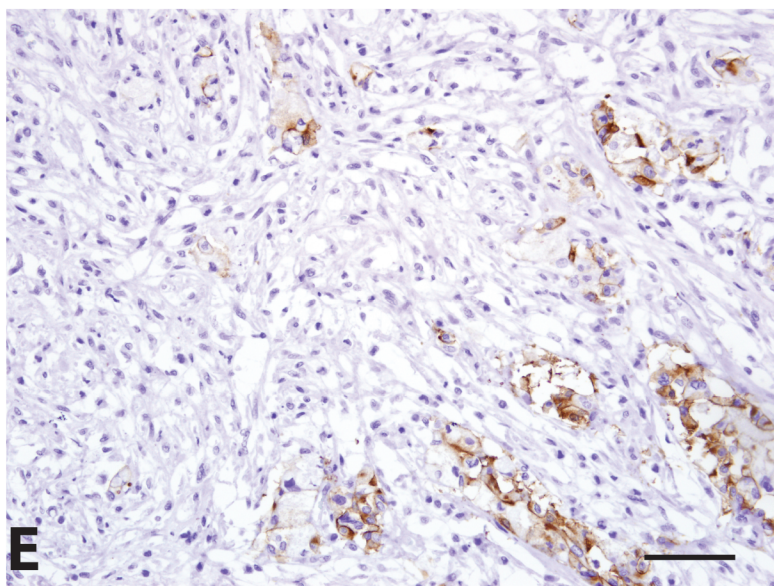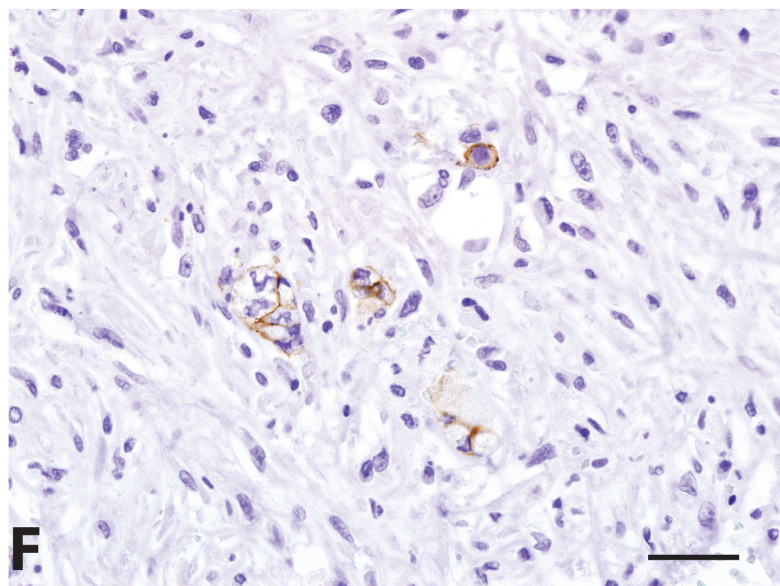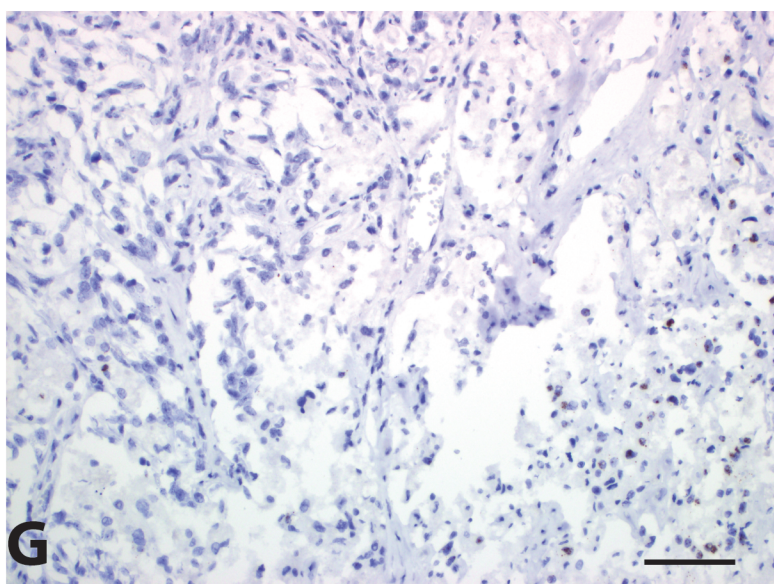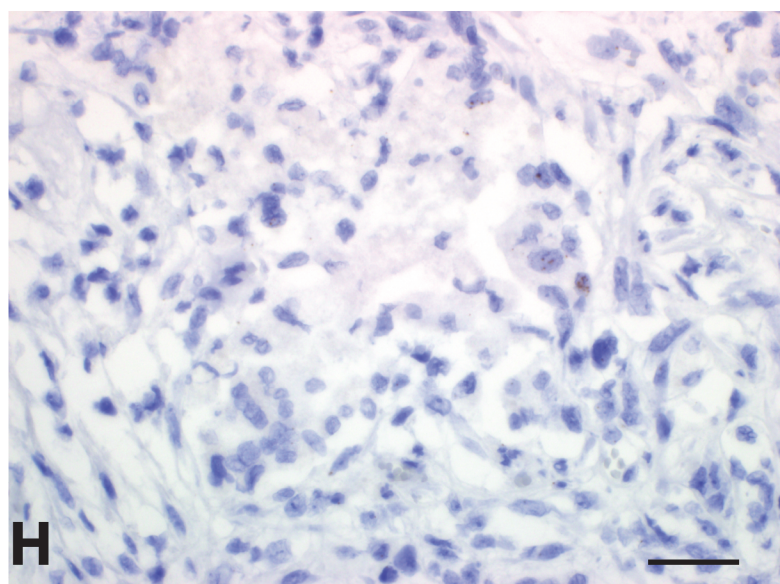

Supplement: NIHMS1789793-supplement-SUPPL_FIGURE_2.pdf [file NIHMS1789793-supplement-SUPPL_FIGURE_2.pdf]

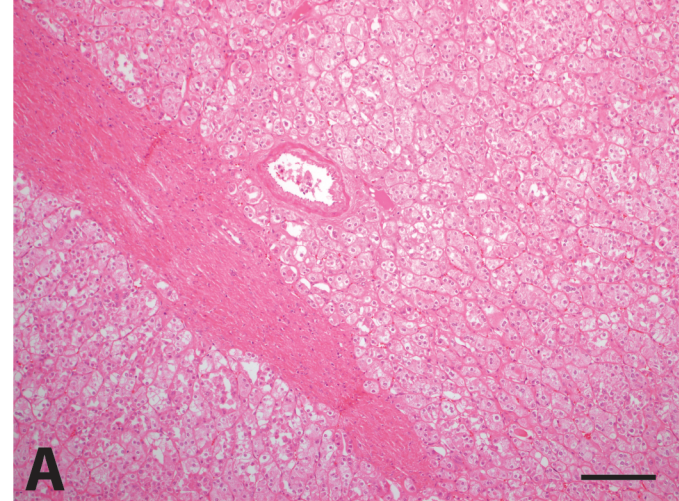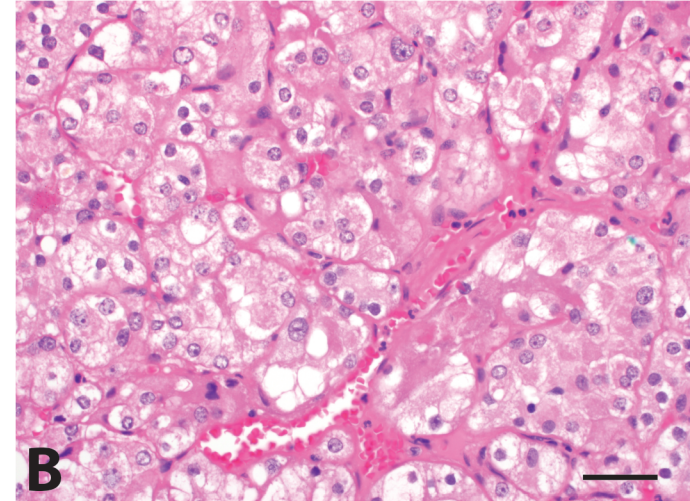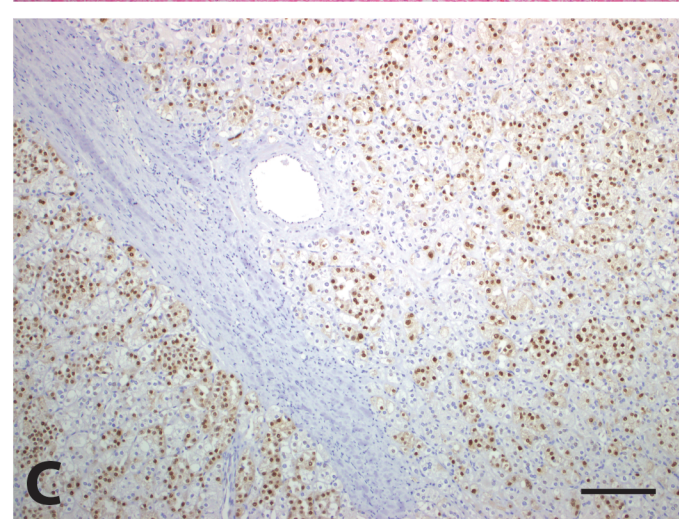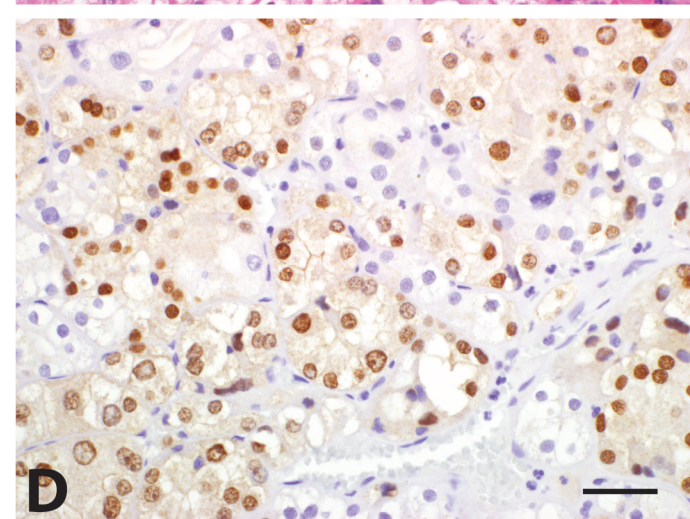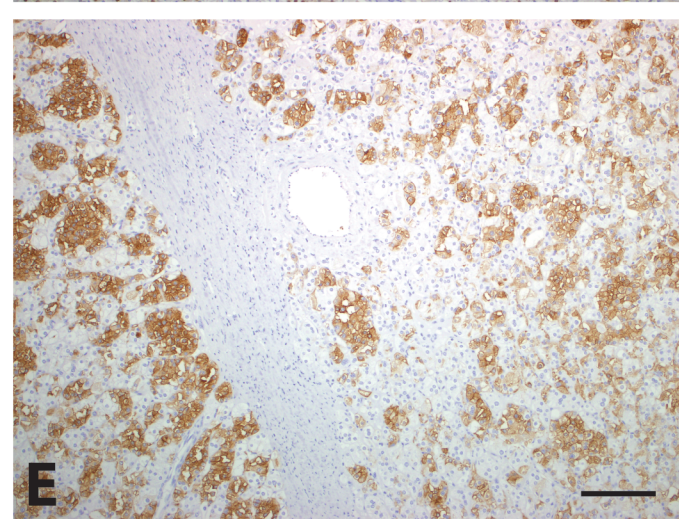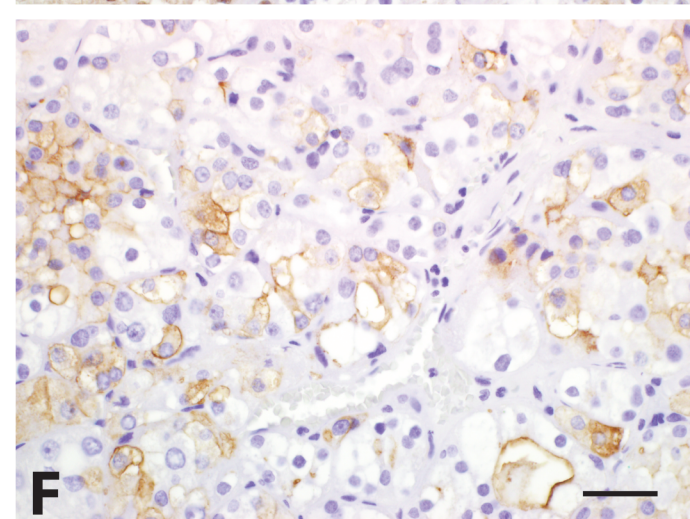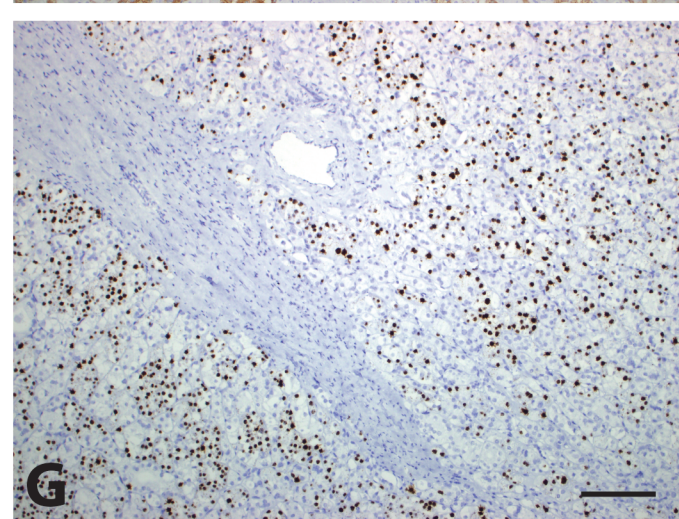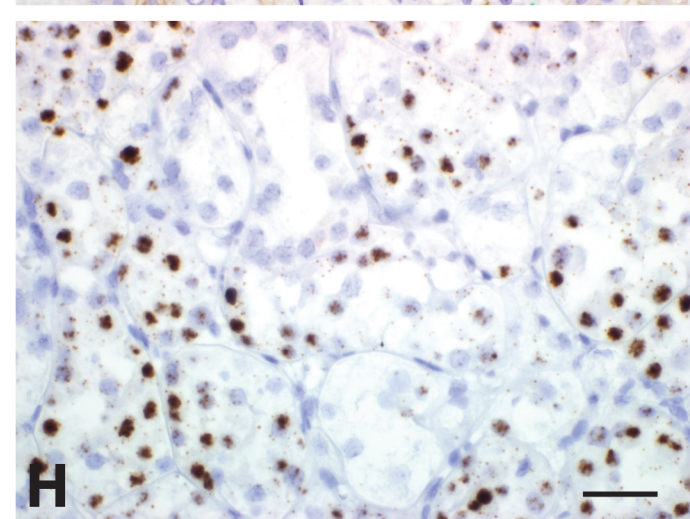

Supplement: NIHMS1789793-supplement-SUPPL_FIGURE_4.pdf [file NIHMS1789793-supplement-SUPPL_FIGURE_4.pdf]

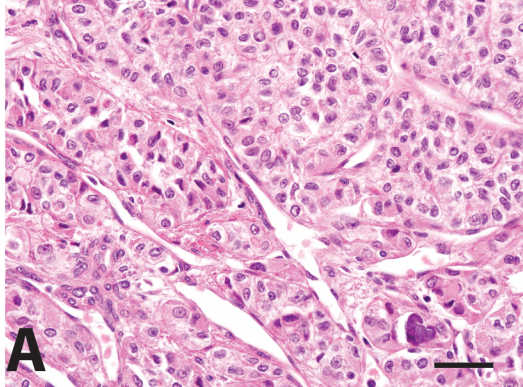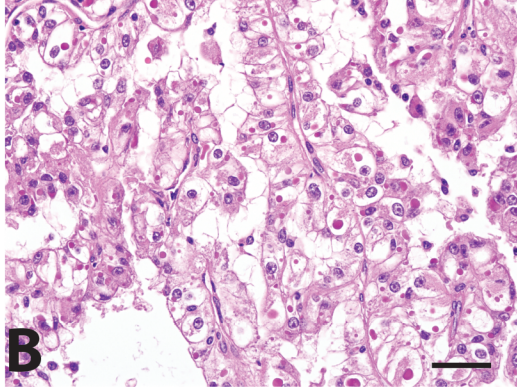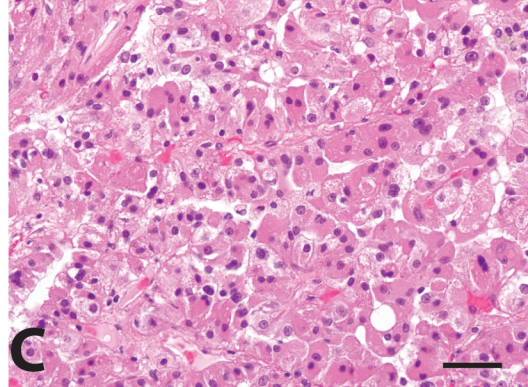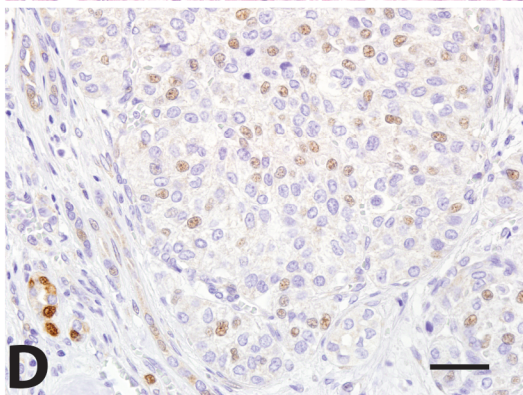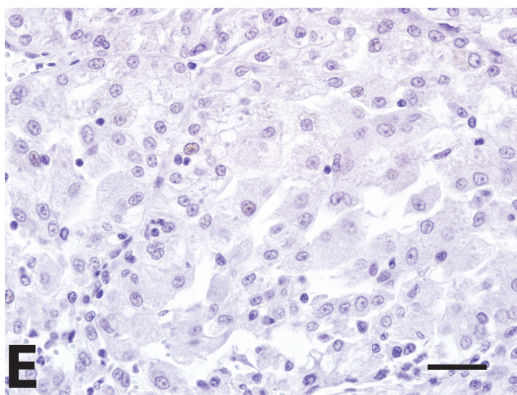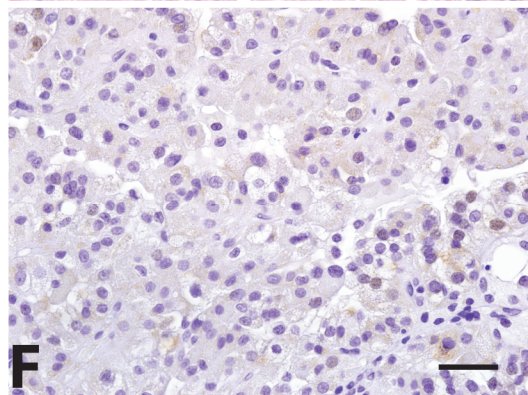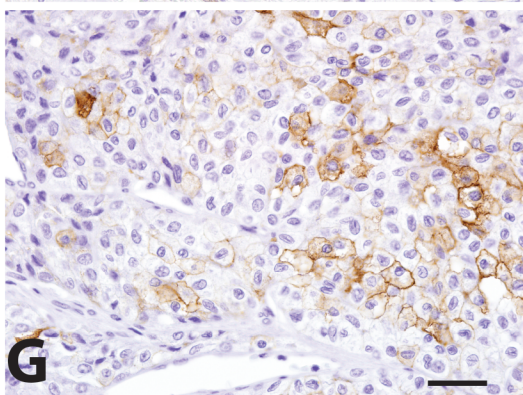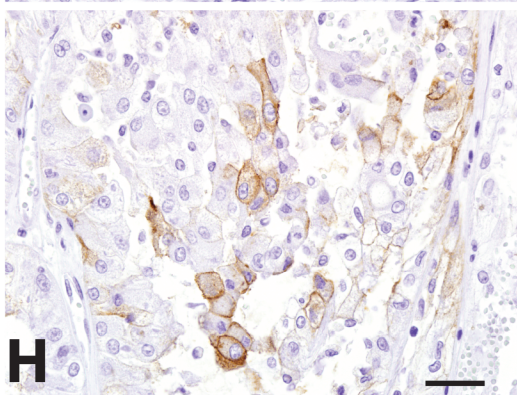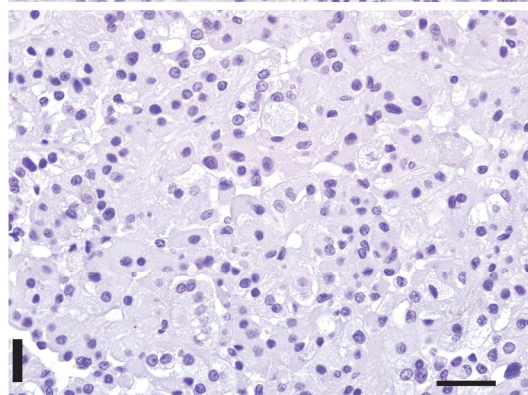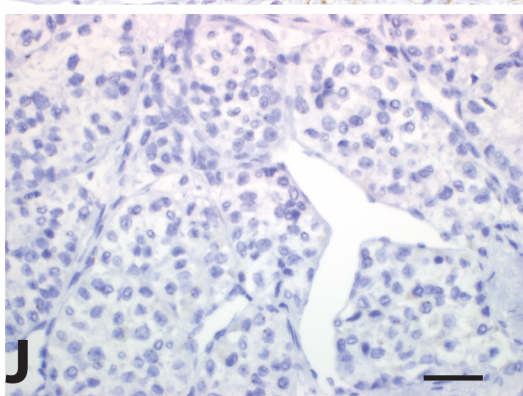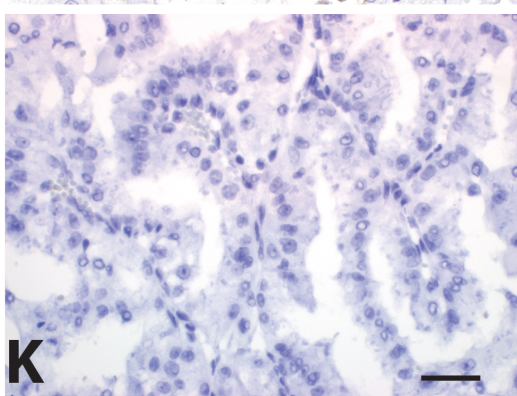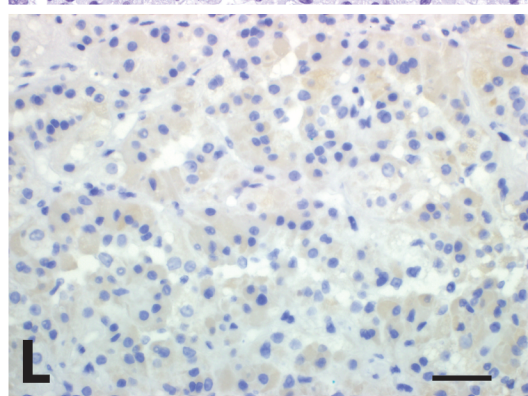

Supplement: NIHMS1789793-supplement-SUPPL_FIGURE_6.pdf [file NIHMS1789793-supplement-SUPPL_FIGURE_6.pdf]

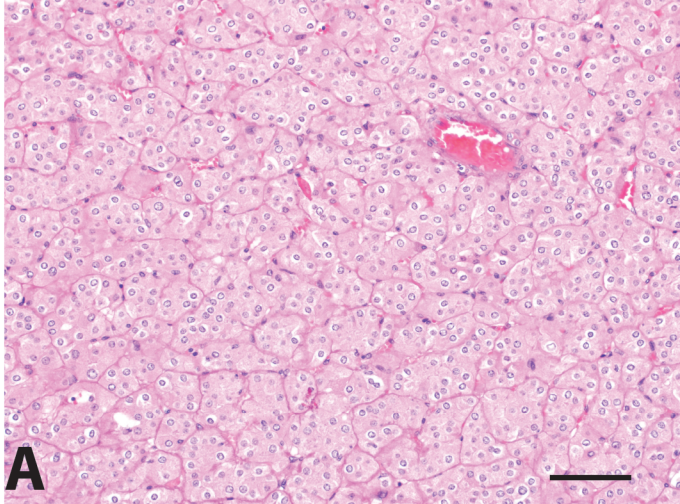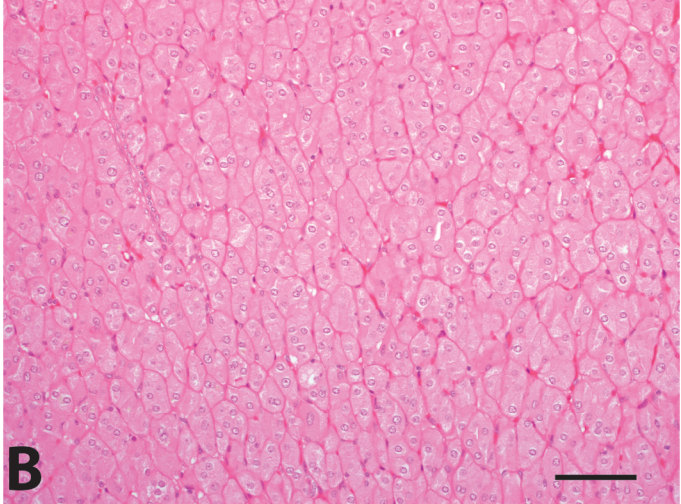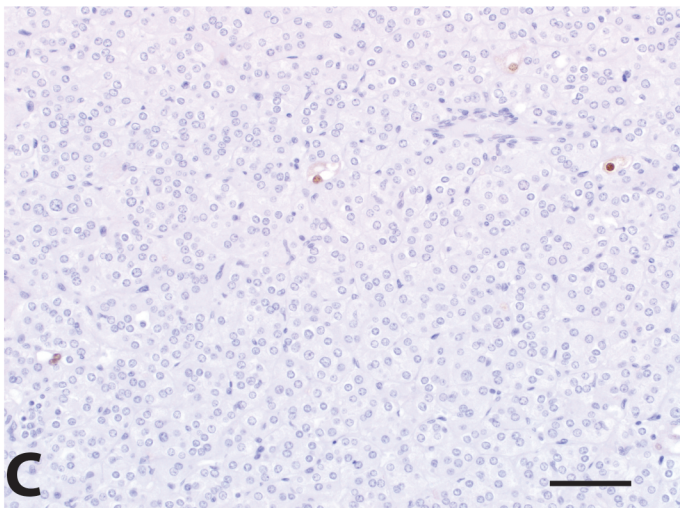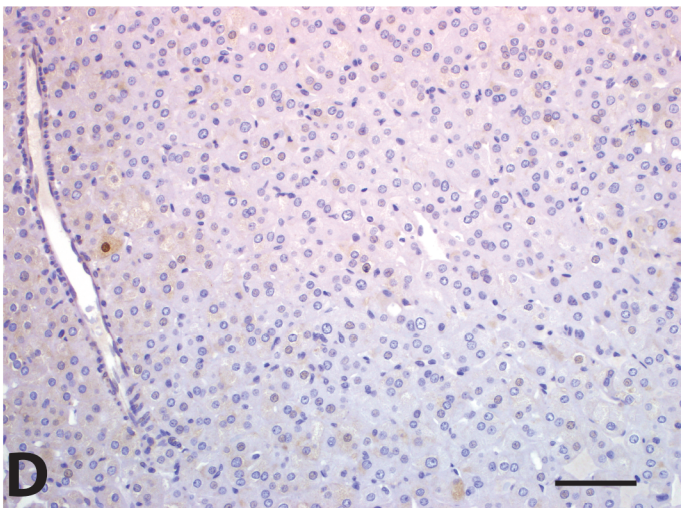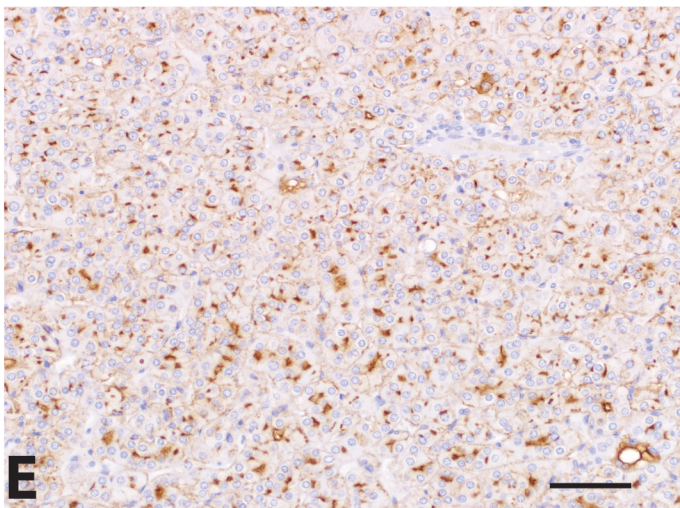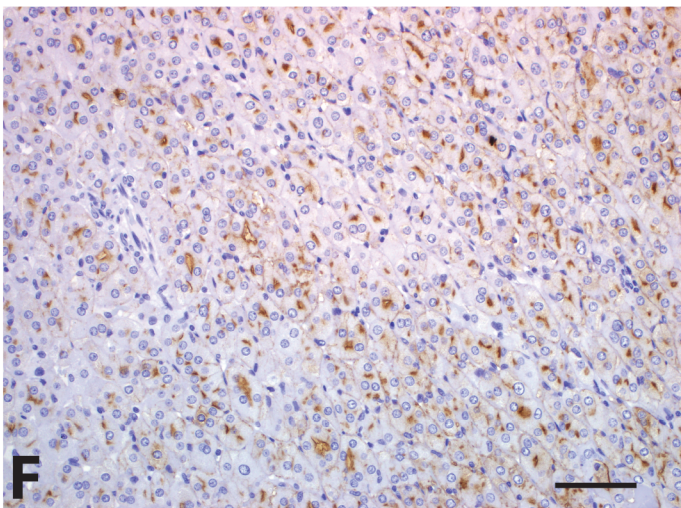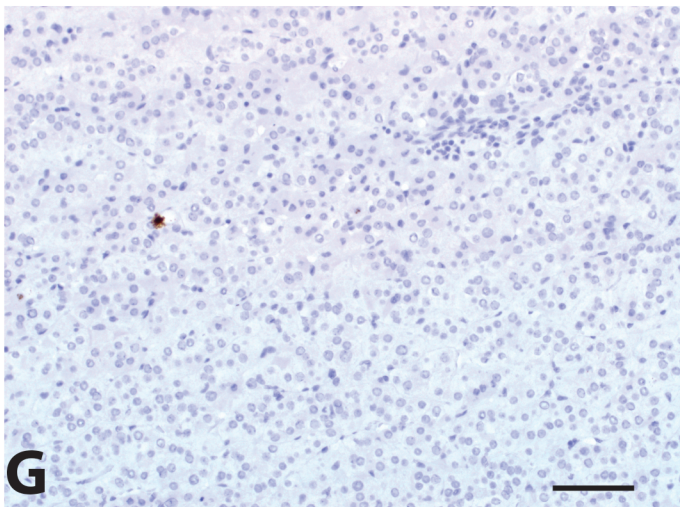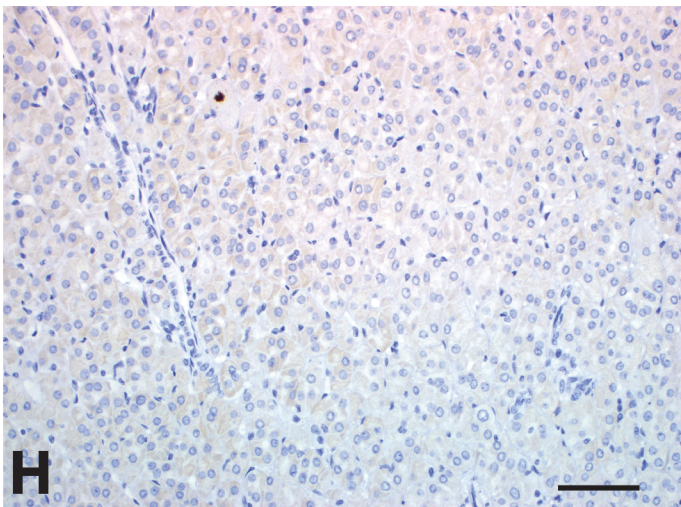

Supplement: NIHMS1789793-supplement-SUPPL_FIGURE_8.pdf [file NIHMS1789793-supplement-SUPPL_FIGURE_8.pdf]
